# Supplementary material for: Myb Transcription Factors and Light Regulate Sporulation in the Oomycete Phytophthora infestans
Source: PubMed Central journal article supplement (PMC3976263; doi:10.1371/journal.pone.0092086), 2014-04-04
Supplement: pone.0092086.s003.pdf [file pone.0092086.s003.pdf]

**Table S1.** Corrected gene models (coding sequences)

>PITG\_1056

ATGGGCAAGCCGAGCAAGATGGACGGCCGTGTCAACGGCACGGGCTCCACGTACGAGCGCCGCGCTGGACGCGCAAGGA  
AGACGATGCTATCATCCGACTCGTAGAGGAGTACGGCCTAAGCGCTGGTTCGGTATATCGGACCCTTAAATGGGGAGA  
ATCACGGTACGGAGCGGACAGGCAAGCAGTGTGCGACGCGATGGCTCAACCACCTGGACCCCACCATTAAAGAAGGACCT  
TGGACTGCCGAGGAGGAACAGATCATCGAGGACGACAGACGCGTCTCGGCAACAAGTGGGCGGAGATCTCCAAGCTGCT  
GCCTGGCAGGACGGATAATGCCATCAAGAACCCTGGTACTCGTCCATGAGACGGACGATGCGTGCATGGCGAAGCAGC  
AGAACAAAACACTGGGCCAAGTGGCACGAAGCGGAGTAGGAAGCAACAAGGCCGCCAAGTTTGGTGTGAATGCGTCGCCC  
GGCTCAATGGTGGAGCTGGCGCGAGACCCATGAACGCTGGTTCGTGAGGGTATGTCGTCCACACAGGCCCTTAGTGTATAA  
GGACTGCTACAACGCCCTGATCAAAACAGGCAGAAGACGGAAAGGGACGTCAAGGGCAACGAAATGTTAATAAGAACTCA  
ACTCGAAGCGGAAACGCAAGATCTGCGCATCTGACGGGCGAGTAAAAACAGCGGCATGTTCTTCCAGATACGCCCTCGA  
CGTGTCTACACACGAGCTATTGCTGCAGCTCTTGAACAACGGAGAGGAGGATTTCCGGTACATTCATCACGGTCGCCAG  
CACAACCAACAAGAACAAGAAGCGACTGCTCAGGGCAAGAGGAACGGAGTCAATGGAGCTGGCGTCCGGTGGTGGCG  
GTGACCATGCATTTACCGAGATGGACGGATCCTTCCACGCCTTCGAGCACCTTGACATTGACTTTAACGAGGTACGCGAGT  
CGGTCC

>PITG\_06748

ATGAACCGTAAGCTGGAGCTCATGGAGCTGGACAGCGGGCGCCAGCCCTAACAGCAGCAACAGTGGAAAGCCCCAGTCC  
GACTCTCGACCTGCTGCATCGTCTGATTTCGAGTAGCAGTAACCAGGGGGTGGAGATGCCTCTTGTGCGGGTTGCCACA  
ACCCAGACTGAGTTATTTGAGGGCAACTGCAACACATGGGAGGCAGCAGCACGACCAGCAGCAAGTATGGCAGCCCCGAG  
GAGTCATTTGGTGAAGAGGACGAGGACAACAACAAGAAGACGGCGCTCGCAAGACCGACTCCAACAGCAAGCGTCCGTG  
GACACGCGAGGAGAAATGACAAGCTCATGCAACTCGTCAAGCAGTACGGCGCCAAGCGTGGTCTCTCATCGCCATGCACC  
TGCCAGGCCGTGTCCGTAAGCAATGCCGTGAGAGATGGCACAACCACTTGAATCCGTCGGTCCGCAAGGACGCATGGACG  
GCTGAAGAGGACTATGTCATCTTCGAGTGCACACAAGATGTGGGCAACCAATGGGCCGAGATTTCCAAGATGTTGCCTGG  
CAGGACGGACAATGCCATCAAAAACCGCTACTACTCGACCATGCGTTCGCATGCAGAGGCAGTCAATCCGCAAAAAGGTC  
CCATGCGTGATGGCAAGAGCATCCGCGTGGCGTCAAGTCAAGTCAAGTCAAGTCAAGTCAAGTCAAGTCAAGTCAAGTCAAG  
CCCAGCCAGCGATCTTTGACTGGCATGCAACACCAGTTGCCACCAGCAACAACAGCTTCCGCACCAGGGGGTGGTGTTC  
ATCCACATATCAACGGCTCTTCTCGGAGGCCCTTGGGGACGCCGACGCGATGGCAACTCGATAGTGGACTTTGAAAGT  
CAAACATGATGTCCGATCACTACGACAACCCACGATGGTCTACCCGCTAAACGGAGGTAGCTTTTCAAACGGGATGAAC  
CCGGACTATAGTCCGATGTCATGACGTCGTCCTCCGTCGGTGTCCCGCCGATGATCTGAATCATAACAGCCA  
GAACGAGACTTTGACTACGTTCCGATGCAATCTTCGATCCAGCGTGTACGGTCACTAGTCCGGTGTGTGATGGGCACTC  
CTCCTTCGACGCTCAATAGGCATGATGAACCTTACGGCTCGCTGCAAGTCAATCAACAGCAACAGCTTGGCAAC  
TACATGATGGCAGGAAACCCATATTTCTAACAACAACGTCGCTGGGATGTACTTTGGGACGCTTGGGCTTGTCTCAGCAATA  
CCGTCTGATGCCCTGTAAACGTCACACAAGCGCTCCTCGACGTCAGGGTTCACAACGTGATATGTGGAAGAATG  
ATAGCCCTGTATCGGTAGCAGCACCAGATATTCGCGGTATGCCCGGACGACACATGCAGCAAGGTCAAGTCAGCGAACCG  
ATGGCATTGCAGCAGTCCAAGCCAGCTTCCATGCCACTGTATAGGCAAGCGCCGAATATGGGTCACTTCAACAGCATGGA  
GCAGGTATGGACGGATGATGCATATCTG

>PITG\_00988

ATGCAAAAGCCTGCAGCATCTAAGCAGCTACAACAGCAACAGCGAGTTCGAGCCGCCGCAACTGGACCCTCCGACGCGTAA  
AGAGCGCAAGCCTGTGTGCAAGTGGACGGAGAAGGAAGATCTCTTGTATGCTCAAGTCTCGTGCAGAAAGTACGGCACGCGTC  
ACTGGACTATCATCCGCACTAAACTGCCTGGCCGTAATGGCAAGCAATGCCCGGAAAGGTGGCACAACACAGCTTGAACCC  
GCAATTCGCAAAAGCCTTGGACACCCGAGGAGGAGCGCATCTTAAAGGAATTGCACGACAAGTTCGGCAACAAGTGGGG  
GGAGATCGCAAGATGTTGCCGGGACAGGACAGCACCCATCAAGAAACACTGGAATCAAGCAACAGCTCGTCTCAAGC  
GCGGCTTCACTCCGACGCTCCACCTCGCAACGCAACCGCGTATAGCTCCGGTCCGGACAGCTTTCAGCAGGGAAAT  
TCAGAGATACCGTCCGCTGTGTTAGGTGGAGTCAACGACGCTTATCCACTCAGCACACTGCTCACGGACCAAGTCGACTT  
TGCAAGTCTGTACCGAACAATTACCTTCAATCTCCTCTTGGCATTCAAACAGCGCAACTCGGTAGTCCACAGATCTCTC  
TGTGTTGGACCCCAACGGACGCGACGTACAACCGACTGAACGCCATGTGGAACATCCCCGCGATGCCAATTTGGGTTTCT  
TCTGGCTTCAGCAACCCTCTGAACAAAGCTACGACGATTGAGCCGAGTAGAACTAAACTGGCGTCTGACCGAGCCCCCGC  
CATGAACGGCAACAGTATTTTGGACGACACGATTTGATGTTAGCAAGATACAGTCCGCGCTTACGAAAGAAAGTGAAGAAAG  
ACGACCCATCCCTGGAGATCCTGGCCAACCGGCACTACTGCAGTTCGATAGGCCACACGGTGTAG

>PITG\_08755

ATGCAGCAGCCGAGTGCAGGCCCTCGCCTACCACGACGATATCACTCCTCCCAAGCCTGAAGACGTCAAGCAAAAACAA  
TGATGAGAGCGAAGTGCAGCAGCTGAGAGATCGTTTGGCAGCACAGGAGCTGTTGACACAGCAGCTACTAAAGCAGCGAAC  
AGGAGCGAGAGACCGAAGCGGAGTTTATGAAGAGGAGCGTGTCTTACAGCAGGACCTTCTTCGTCTCATGAACATC  
GTGGACTGCAGATGAGATCCCGTCCATGCACATGCAGATGCAGCTTTCGCTATGGCTACAGGCGTCAAAATGGCGTT  
TCGAGGACTCTCGCCGCGATTCCCAGCCAGAGGCTGCATCGGTCCAAGTCCAACGGGACACAGAGTAGCCAAGAAGCGAA  
ATGCTGAGAGTGACGAGGCTCAAGCAGTGGCGGCATTTGGTCTCGCTGCACGCGATGCTGCGATGTTGATGGACATGTCA  
CCGACAGATAAGCGCGTCAAGACGTCGTCCACGTCCTCAATAACAAGCTGAGTAAACGTCAGTGGAGCCCTGAGGAAGACGA  
AGCATTTGGAGCTCGCCATTCATCAACGGGGGCAACGATTTGGTCCGGCTATATCTCGACTGCTGCCTGGGCGTTGTGGGA  
AACAATGTCCGGGAGCGATGGGTGAACCACTTGGTCCGGCAGTGAACAAAGAGGCTGGACAGAGGAGGAAAGACGAACTC  
ATCTTCAACGACAGCGACCGCATCCGCACTCGCTGGCGGAGTCAAGTCAAGTCAAGTCAAGTCAAGTCAAGTCAAGTCAAG  
CAAGAACCCTACTACTCCACATGAGACGCCAGGGGCGTCAAGTCCGTTGGCAACAAGAGCAGATCCCCGACTCAATGT  
CCGAGACCTCTGTGACCGATGACAAAGCCGGCGTATGTCAGGATCCTTAGTGTCTCGGAGACAAGCGCGGTGAACTG  
CCCATGGAAAACATT

>PITG\_08807

ATGCAGATCTCGGCCATGCCCATGACCGCTGTAGACTCCATAATTTGTGTCGTCGTCGGACTCGTCAATCGTTAGTATCAC  
CAGCAACGACGGTGTGCAAGATAAGCGTCGCCCTGGACACCCGGAAGACGATGCCGTTATCTTACGCTTCGTGCACGAAT  
GTGGCTAAGCGCTGGCGAAGATTGCCCTCGTACCCGTCGTACCCCAAGCAGTGCACCGCACACGCTGGCTAAC  
TACCTGGACCCCAACATCGACAAGGCCCTTGGCGCGCGGACGAGACGCAGCTCATCTGGCGGCACAAGAGCGAATGGG  
CAATCGCTGGGCTGAGATCGCTAAGCTGTACCTGGTCGGACCGACAATGCCATCAAGAATCACTGGTACTCGACGTATC  
GCCGTCGCTGTGCGCAAGCGGCAAAGCTACAAGAGAAGGTGAATCAGTATCAAAACCGAATGGAAATGATAACCTCGGAG  
CAAATGATCATGGCGACAACAATGGCAATGCCAAGCAACACCAGGGCCAGCTGGCAACAGAGGCAACTTCAATTTGGAA  
CGGGGCAATAGCAGCTTCCGCTGCATTAGCTTTGCCGTCGCCGCTGTTAGTAAGCTCGCCACTGGGAGCCGGATGCTTCG  
GATCGGGTATTCGACGTTGCTGTACCAATTGCGATTATCACATAAATCCACTTCGTCTGTGGCCGTGTCATGGCAATG  
CCCTGGCCGATGCCCATGACACTACCATCGCCAAAGGCTCTTTTTCCACAGAGAATAGCGCTTTGGCCGTCGTTTTTCAC  
TCCTCAGTTTACGAGCAGGTCGACTGAACGCAAAATGTGCCGCACAAAACGACCAACGTTACAAAACCAATCGGGCT  
GGATGGGTCTCCCGGACTGCAATTAACGGGCAACGAATTTTTATCGTCAGGCAGTAGCTGTGGGAGCATGTGAGTGCA  
GTAGATACGATCCCTGCATCGGAGATCGACAAGACGCGGTGGATGAACAAGTCGAGAGTGGAGGTTCTGAAACGACAGGG  
CACTCCTGGACGTGAACGACGCAACTCGGCTGATTTATTTCTCGACTGTGTTGAGATGATGAATCCTATAACGGCAACAC  
TGAACAAATGCAACTCGCAATGAGTATTGCAACAATGACAGCATGAAGGTAGCACCACAGCTTCCCTGGCCCTCT  
CCGATGGACAGCGAAAATCGAAACAATGCAACTTTCTGGCGTCAAAAAGCAGTGGTGGGATCACATCGATATGGGCTT  
CGGTGCCAAGAACAACGGGGCTTCTGCCCTAGACAAAACAGTTTCAAACGTGA

>PITG\_05990

ATGGTTGCCGAGTCAAGCAGTGAAGCGCGGTCGGGACGCTGTGAATGCCGAGCCACACGCAGAACAAGCGGGCGAGGCCA  
GAAGAAGAAGAAGCGGGCGTGTGAGCAAGCGCTGGACGCCGAGCAGGACGAGGCGCTTAAGAAGGCCGTGGCCGAGG  
TCGGGCACCGCAACTGGATGGCTGTGGCCGAACGCTGACAGGACGTGACAACGCGCAGTGTTTACAGCGTTGGAACAAG  
GTTCTAAAGCCTGGATTAGTCAAAGGTCCTGGTCAGTTGAGGAGGACGCGATGCTCATGGAGATGATGCTTAAGGGCTA  
CGACAACCTGGCGCCAGGTGTCAAACAGCATTTCCCGGACGAACGCAAAACAGTCCGCGAGCGTTGGCGAAACCGATTGG  
ACCCAAGTATCAACAATCACCATTACCAGGAGAAGACGAAGCCATCCAGCAAGCGTACGAGAAATATGGCAACCGC  
TGGACGCAGATAGCAGAGCTTCTACAGGACGTACAGAAGACGCTGTAAAACCTCCGATGGAAGGCGCTGAACCCGAACCA  
GAAGACATATACAAGCTTGGCCGTCGCCGCTTTCTAAACTCGGATGACGCGCCGCGAGTGTCCACGTGCGCAGTCAGAC  
CCAATGTGCCATATACCGCCCGACACAACCTGTGAAGATGGAATGTGCGATCACCCAGCTCCTGTGAACAACAATGCT  
ATCAGCAATACGACTCAAGTAAATCTGGAGCCTATTTTGACGCTCTGGAAGACGAGACGAGCAAAAAATGAGCGCGGA  
GGACGTCATGATCCTGAACGAGTTTTGCGTGGCCACTCGAACAATTCGCTCGGGAACGGTAGTTTCAAGAGTTTGTCTAT  
CTGCAACCAGTTTTGCTGACTTGGCGGATGATATCGACGCTGCGATTATGCGGATGGAGTCCGAGTCAGGGGCGCACCCG  
CTGACGGAGTCTACAGTGAAGACTCGACGGCGTCCAAGCCTTCCACTGGGCGCTCCTCCGCACCGAGTGTCTAATAA  
GATGCTGAGTCTTGAGACACAAGAGCGCGAGTTTGGCTCGATTACGGCAGATGTGGAGCCGACGATACGTTGGATCA  
ACGGAGGCTTGACGCGACGTCTCAGCAGCTTGTCCGTAACGGAGAAGGTCTTTTCGAGCAGGAACCTGTCCGTTGCCAAC  
CAGAAATCGAGCTCTATGGACTTGTTCGAGCAGCAACTGGCGTCACTTCATGATGCAGGCTCCCTGATGAGTCTTCCGTT  
GGATTTGGGCGATGAAAGCAAGTCAGATAGCGCAGTGGCGGGCTGCATACGATGCAGTGAATGCTCCTCCTGCCACTT  
CACATGGCTCTTTGACGCGCTTGATCTTGGAGGATGAGATCCCACTGCACGGTCTATCGAACCAGACAGCGACGACGGAC  
AAGAAGACGATGACAGCACAAGATTTCTACAGTAGCGCCATCCCACAGCAACTGTGACAGCACACCGCTTTGAGAT  
CTAG

>PITG\_05989

ATGTTGCATTACAGCAAAACGCGAGCGGAGGCAACAGACGATGCGTTGGGTTCCGCTCCATGAAACTCCGAGCGAAGCGCA  
AAAGCCCGCGAGGATGAGAAGGGCAAGCGCTGGACCCTGACCAGGACGATGCGTTGCGCAAGGCTGTAGACGAGTTTCG  
GCCAGCGCAACTGGAAGGCCATCGCCTCGCGTGTGGATGGACGCAACCACGCGCAATGTTTGCAGCGCTGGAACAAAGTG  
CTCAAGCCTGGACTGGTGAAGGGCCACTGGTCTTTTCGAGGAAGACAGCAGTGGAGCAGATGGTGTGCAAGGCTGCCA  
CTCATGGGTTGAAGTGGCCGCTATATCCCGGAAGAAGCAGCAGTGTGCGGAGCAGTGGAGAACCACTTGGACC  
CGAGCATCAACAATCACCTTTTACACCTGAGGAAGACACAATTTACAGGAAGGGTTGAGAAAATGGGCAACCGATGG  
ACACAATTTGCTGAATTTGTTGCCGTCGACGACGGAAGATGCGATCAAGTTGAGATGGAAGCATTGAACCCGAACCAAAA  
GGTGAAGCCAAGCTGGTCGACCGAAACTCATGCCAGGAATGACAGTCAACAAGCAACGCTCGATGGCTCCCCCACAC  
CTGACGATGTTGCGGCCACTCTGATGAATGGCCAAATACCATGCCAGAGTTGCCCTCTTACGGAAATGGGTACCTTGAC  
CCAATGCCCTATCTCGACAATAGTGTACCCATTACACCAATGACAATGCCACCTCAAATGGCAATGCCTCACGAAGAGTC  
TCTCCCTACAACACAAGTACCCATGCCAGCCAATACCCAGAACCATATCGTTGAACCTCTGAGTGTAGGTTGAAGGCCG  
AAAATGACATAAATGATGCAGCCATTCTCAAGGAATTAACGACGAGTCACTCGAACAGCTTACTGAGCTTTGGTAGTGCA  
CGCGGCTTGACCTCATTTACAGACATGTGCCCCGAAGACTTGTTCGCAAGTGGCGAACTGGACGAAATGTTCCGTGCAAC  
AGTGTCAATATCCAAGGAAAGAGGCGAGAGGGGCGTCTCTCAAGTAGCAGTATGATGGACAGTTTGACGAGCTCCTTTA  
AGAACCAGAGTCTGTCAGAAGGCTGTACAGAACCTGGATCACGAAGACAAGCATCTGTTTCAAGGACTTATTGACAGT  
TGGCGGGCTCAAAAATCGACTGGTGATGCAAAATCCACGAGGACCATATTGCCAATTTGCCAGTGGAGACGCAACCGGTA  
CTCGCAACATAGTTTCGAAACGAGTAGTGCCACAATTTGACGCAATTCAGTGGATTGTGAGCAGACAGGTCGCTATCTC  
GACGAAACTCGAACGGCATCTCGTACGAACTGGCAACATTTGCAATGATATTGACGATCTATTGGACTCGGATCTCATG  
CGCCGATTCGTAAGGGCAAGATGTGCTAG

>PITG\_00038

ATGGCGACAGTAGAAGACTCGCCTGTAAGCTCTGCCAAGCTGACGGAGCTGGGTAAGGCTCTGGACCAGACGCTCTATATC  
CAATGTCAATGGTAAATATATCGCCCGCGCTTCGCACGAGGCGCCAGCAGTGGACATGGACGCCACCGAAATGC  
CTAGCACTCTGCAACCAAACTGCCAGCCAAGAGCCCAAGAAGCGCGGCGTACCAGATGTTTAAAGAAGATGCTGCCA  
GCACCAGCTTCGCAGCGTCATAAGCAAGTACGAGCTCTCCACAGTCTTCAATGCAAGGAAGCAGCGGCACGGAAGAGGA  
ACCGTCAGGCTCGCCGGCCCCGTCGTGACACTCCACCACAGGCACAGTGCAGCAGCGTCCACACTCAGCCAGCGA

AATTGATGGTGAAGATCGGAGAGGCAGCGGCATGGGCGTCCCACGAGCGCATTGATTCTCAACGCAGTGAAGCAGGCG  
CCGCCAGCGAAGGAAAAATCGAATCCGAGACGGTGGTGAAGCAGGACGAGTCGCTGAGGTTGGCGGTTCGAGCGGAG  
TGGCGAGCGCAACTGGAAAGCCATTGCCGACCAGGTGCCTGGACGGAAATCACACGCAGTGTCTGCAGAGGTGGACGAAA  
TGCTCAAGCCAGCTTGATCAAGGGCCACTGGACCCCGGAAGACGGTAAACTGCGGGAACGTGGCGGAAAGGCAAAA  
AAGAACTGGGGACAAGTAGCCTCGCTCATTCTCGTGAACATCCAAAGCAATGTCGAGAGCGTTGGTGAATCATCTGGA  
CCCCAACATTAACAAGgATCTTACACGGAGGATGAAGACAAGATTATCGTGAATGCAAGCTAAACTAGGCAATCGCT  
GGTCCATTATCGCTCAGCAGCTCAAGGGCCGAACCGAAGACGCTGTTAAAATTCGCTGGAAATCATTAATGCGCGGACGA  
CGCGTCGATCCAAAGAAGATAAAACACCTGCAGCAGCTGCTGTGAGCACCGCATCATCTTCTCCTGCCGACGTCGAGCG  
GCCCAAGCTAAACCTGTAAAGCCAGCCCGTCCAGCAAAAGAAATCGTACCCCGTCACCACAGCAGAGACAGGCCACA  
ACCCGACTGTGAAAAATGAGCGGCAAGTCGCAGCAGAAAGCAAACCGGTGGTTCGATGCAGCAGTAGGGAGCATGCCAACT  
ACCGTTTTTGTCAAGAATCAATCAATGTGCGACCCAGATATGGCAGCAGCATGGGAGCCCCGTGAATTCGCTACACAA  
CGTGAGTGACCTGGTGGCCGCGTCAATTCACAACCTCCAGATGAGTCAGCGCTTCCATCCGAACCTCGGCGGCGCATCCCG  
GCAATGCCAGTTACCTGGCAATCCGAATCAATTGGTGACGGGTATTGCACCTGGCAACCAGCAACCGCCTGGTGTGTAT  
GGCATGGCTGATGGGGATTTAACGTGAACATCCAGCAACAAATGCTACTACAGCAGCATCCGTCGCAGCATAATTCAGCA  
CCAGCAAGTACCACCAGCATACCAGTATCCTCAGGGATACACCATGCAGCAGCAAAAGTATGGGGGTGATGCCAAACTACG  
GAGTGCCCAACACTTCTCGCGTCAACCAAAATGCAGATGCAGATGCAGATGCCATGCCCAGTATCCTCAATGTCAGCAG  
CAGTCGATATCGATGCCTCCGACACCTACGTACTCGTCTCAGGCAATGGCGATGGCAATGGCGAACGCACAGTATTCAGCA  
GCACCAGCAGCATCAGCAGCATCCTCCTCCTGTGCACCAAGGCTTCAGCGGTGCACCGCTTACCCTCGGTGTTGCATCGC  
TGGGTACGCTTCCGGGACGTCGCTATGATCCTTCCCACAAGTAGCGGTGCCAGCAACACTTCCAATGGCATTGGATCC  
AATGTGGTCTTCTCCGTCGTCAGCTGCAGCAGCCGAGGAGGAAAGCTCTGAACACTCCACGGGAAGAATGGGGTTC  
TTCACAGACTCCGCGGTCTCAGATGATTATGACGGAAGGCCACGCATCAGCATAACGAGCTGTTCCATCGCAACGCCCTTC  
GACTAATGTTACAGGAGCGCGATAAGCAGGGATGTCATATCATCGCTCCATCTCCGGTCAAGCGCTGCTCAACAAA  
GAACTGGAAGCCAACAAGGAGCGACAAGCTCGACAGGCGATCATGCAGAAGGGCTGGAAGAGTGCCTGCGAGTCGATGGT  
CTCTTCAACAGTGTGACGATTTATCAACTCTGGACGATCAGCAACGGTTTGTGATGGCCTACTGGAGAAGGTTTCATTGT  
CTGCTTGGACCAACAGACGACGAGTTACTGGACCAGACTGTTGACATAATATCAGGA

>PITG\_16114

ATGGCGCCGGCAGCCGAATCGACCCCGCCGCCACCGAGGCTGGCGCGTGCACCAAGCTGCAGCGAACTTCCAAGAA  
GCGCAAGGCCAGCAGTGACGCGCCCGCTTCCGAGCCTCCGCGCTGCGCGTGATGCCAGCGGAGCCTCAGCACGCT  
GTTTCGCTTTGTGGCTTTAGCGCTTCCACACTGGATCACTTGTCTACTCAGTACGCGAGTCACACGGCCGAGACCACAAG  
CAAGCGACGCCCCAGATGGCACTTCCGCTCGAAGTGGCGCAGATGGTGGTGCAGCGGGCGTGGATCAGGCGGCGCTGGG  
AGGCGCCACCAGCGGTGGCTTGGAGTCATACAGCAGCAATTCAAAGCTGCAGCTGAGATGACGGCTGCACTGGAGCGGA  
AAGACCGGCACAGTGTGGCGGTGGCAATCCGCAAGCTGCATGGCTGACGCAGGCGAGGAGATGAGGAGTCAGTGCTAATC  
ACATTACAGCAGCTGCGCATATCTTGCTACAATCGCCACCTCAGCTACGGCAGTCTCGGTGGCAGCATCAAGCTGGA  
AAATCAAGCCCAACCCAGCACAAAGTACAGATACGCAACGCAACGCTCGAAGCAGAACGGAAGGATTCTAGTATTCACG  
AGGCGGAGGCGGCACAGGCGCTAACGGGACTGCGAGCCACAGCTTCGAGTGGCGAGGAGACGACGACAACCTGCGCCGTC  
ATCTCAACGTCGCTCCTCGCTCCACCGCTGTACCGAAGGCGTCTCCTGCGGCCCTCAAGCCTCGTTCCTTCTTTGT  
GCTGGGATCACCTCTGACCATCACAGCGCCGAGCCTCAAATAGTAGTTTACATTTCCACCCACCAGAGCTGTTACGC  
CCGGTTCGGTGGCGTCCGCGACCACTCCGTCCTACTACCAAGTCTCTTTGGCGCAGGCTGTTGGCCCCGCTGGCGTCT  
CCATCCAGTGAACAGTGGAGACCGTTCGCGCAGAGTGTGGCTGGGATGGGATACCAAAATCCATTATCTGTCAGGGA  
CCAACGCAACCCGTTGGGCTTACTTATTCGCGCGGATGTTCCCAAGCATCTCTCACTCCTGTGTTTATTCGTTTTC  
CGACTGTGTCAGCAGCAATAATGTCGTTAATACTGGCGTGTCTCTACGAACCGACCGACTTCCGCGTCCCTGTCAAG  
CGAAAAGTATCACATCCAAACAGTAAAGTGAAGATGCGATGCCGAAGTTGCTGCGGCTCGTGTGCTGCATCAACGGC  
AACGGCAGAGGCGAGTGCAGACAGCTCCGTCGTTGGCGTGGGTCTATCTCCGTCGCTGGCACACCTAGCACACCTG  
CGACTCGAAAGCTACTCCTCGTGGTGGACCAAGGAAGAAGTACGCTCTGCGCGTGCAGTAGAGAACCACCGCGAA  
AAAACTGGAAGGCTATTGCTCCGCTCAAGTGCCTGGACGGAACACCGCAGTGTCTGCGAGTGGACCAAGTTCAGTCA  
CCCAGGTCTCGTGAAGGGTCACTGTCTCCTCGCACGAAGATGACCTACTGCGACGCTTGTGGCGACAGAGCAGAAGAACT  
GGGGCAGCTGGCTCCAAGATCCCAGGCGCACGTCAAAACAGTGCAGCGAGCGGTGGCACAAATCATTTGGATCCGCG  
ATCGTTGCGGTTGCTACACCCCTGAGGAGGACCGCTGATCTTGGAGGCACAAGCAGACTGGGCAACCGCTGGTCCGGT  
CATTCGCGCGATGCTGCTGCTGCGACCGAAGACGAGTCAAGATCCGCTGGAAGTGCAGCTGCCGTGTGTGGCGAGCGC  
GCAAGTACCTGCGTAAGAACCCCAACAGTGTGAGGACATGCTGAGCGAGCCTGCACAGACGCTCGGACCCCGTTGGTG  
CCTCCTACTGGCGACTTTAAGTGGCGGTTGCCGCTTCCAATGGTCTGCGAGACGAACAAGAATCAAGCAAAACGTTGTC  
TGAGGCGACGGCGCAGGCTGTGGCGGAGAGTAA

>PITG\_08697

ATGCGACAGAGACTTACGGTAAATTTTCTAGACCATCCCAAAGAGGAGCTTGTCTGCGCAGGCTTTCGAGATCTGGA  
AGAGCTGCTTACATAATTCAGATACTACGCGCGCTCCTCCGAACCGTAAACGCCACCACAGCTTAAACAGCGACAACAAT  
TCGCTGCGGCTAATTTGGGACGCCATACCTCCGTCCTCGTACAGATTATCCACCACCTCCTGCGTCTTACCTGGCGCA  
TTGCTGCTGCTGCTTTCACCTATGGCGAGATACGCGCTTCCAAGTGGTTTCATCGGCATCCTCGTCTTTCGAGTC  
CAGATACACGCAGTCTTCCCCAACAGGCGCAATCCATTGATCGTCAGCATTCAGATGGCCAGGACAACGATTATCAGG  
ATGACCACGAGTTCGATAATGACTTCAGTCCAGTCCGGTGACGATCACAGATATAAAAGCAGTGGCCACTTCTCCAG  
TCAACCTTGACATCGCAGGATGCTTTCGAGCACAGACTGAAACTAGACCATGATGCGCTCACTGGAAAGCGTCTTGATCA  
CAGTATTTTCTCCCCAGTCTCATCGACGTCGGGTAGTGTGCTCTCCACGCGAAGAGTTTCTCGTCCAGGCGTTTG  
GCCCGGTGGGTTCAAGTGCATGGTACTTCTGTGTCAAGTAAAGATGATTTGGATGACAGTCTTAGTGACGACGACGAGC  
AATAACAGGGAACCTTGTGCGAGGACTGCCACTGCAATTAACAGACCGGATACAGAGCTCAAGATGTCTAACAAGCA  
GCTTGAAGCGGATATTCGCGGTGCGATGCATCAGAACTCCTACCATCAGCAACATTCGCCCAGACTGCCAGAGCTTACAG  
GGTTATCCCATCAGCCATTCAGCCACCTTCGATGGCTCGTTCGGACTCAATCGCACTGCCATTTTCCCCGGAGTAA

CAGGAAGTACACCAGTCTCAATGTTGGGACTCGCAAGATATTCGGCCTCATCTCATTCAAACCCACAAAGAACCAGG  
GTTTTTTTCCCAGAGCAACAGCATCAGAGTCCCTTACGTGTGTCTGGCTAAGACGCCACAAAGTAAAGGAAC TAGCG  
GGGTTCAAACGCCACCAAATGGCTTCGCGATGAAGACGACGCTCTTCGTGTAGCTGTGGCTCGATTTGGTGGCAAGAAT  
TGGAAAATGATCGCCGAGACGCTGGTAATGGGCGCACCAGTGTCCAGTGTCTTCATCGCTGGAAACAAGGTGCTAAAAC  
TGGTTTGATCAAGGACCTTGGACACTGAAGAAGATCGTATCCTTGACCAGCCTATTACACGCTATGGAGTCGGTAAGA  
TTCGCTGGTGTGACCTCGCACTGCATTTACCAGGACGGATTGGCAAAACAATGTGCGGAACGTTGGTGCAATCATCTCGAC  
TCGCGGATTCGAAAAGGTGAGTGGACTCCTGAGGAAAGATGATATGGTCTTTTCGATGGCAACAGAAGTTAGGAAATAAATG  
GAGTAAAATCGCCAAGCTGCTCCCTGGACGCACTGAAAATGCCGTCAAGAATCGTTTCAATTCAGCCGCACGGCGCAAGT  
GGCTTATGAATCAAGCAACAAGTCAGCGGCCACCACAGCAGCGCAGTCAACACCTCCAGCTCCGAAACCCCATTCAGGTG  
TCTTCGATGACAGCTTCAACAGCAACAGACGTTGTTGACGTCCTCTTCAGCTACCAAGAGGGCAATGTCTACAACGT  
CAGTACGATACCATACGGGAAAGTATCGCCGCTACCCTCGACAGACGCACTGATGGAACATCACCCGCACAATATGATCC  
CACCCTTGGACGGCAAACTTTCATGCCGCACTACACACCTCCAACCTACCAGCTATTATCCAGTGGTCTGTTTTTTCGT  
CCTGTGTGGCAATGGGGAGTGAAGAGTTTTCAACCGCAAGAACAGCAGTATCCACGGAAGTTGGTAAGGGCGACTC  
GATGCCGTTGGCGCCACCACCGACGTTTCGTGCCTCCCCCTTGAACCTCGCTCTTCCACCTCCTCCAGTCAATATTTTCT  
CAGCTTCTAGCCGCAATTTGCAACATTTAACCAGTCTGTAGTGGTGGGGCCTCCCTCACCCCTGTCTTCCCTTTCCCG  
TCTCAACTGGCGACTCCAACCTCCTCACCGCACCTGGGGTTATTCTTCTGCAAAGTCCGACGACAAGATGTCGACTC  
CTCAATTTCTCAAAAAGGAAGAAAACTCGAACGAGATGATTTAGTCTTCAAGCCGCGTGGCGTCAAGTTCTGCTCCTG  
ATTCCAGTGTTCCTATGGACGACGAAAATATGAACAGCTTCTTGACAGCGTCCCTCGAACTCGACGACATCATGGAA  
TAA

>PITG\_13133

ATGAGTATCAGCGTCAGTCGAGAGTCTATCTCCAAGCTCATGGGCGAGCTCGTGGACGGTTTCCCATAGAGGGCGATGG  
CCGCTCGTCTATCTCAGACTTCGGCAAGCTGCTCTTACCGAGGGCCAGGCCAACGGCAGCAGCAACCGCGCCAAGTCCG  
GCCAGACAGGGCCGAGTGCAGGCAACAGCAAGCCAACTGCGGCCACCACGAGTCGTGGCACTACTTCTTCGTCAAACGGC  
TTGACGACTCAGACTCAGACTGGAAGCAAGCGTGTGTTACAGAAATTAAGGGCATAACCCGCCAGAAGCAGCATGATAT  
TATGAAAACCAAGGACAAGGCCGTGCTAAGCGCTGGACGCCAGAGGAAGACGACAAGCTCCGTGAGGCTGTGGCCGCC  
ATGGCGAGCGCAACTGGAAGTGCATCGCCGAGGAAGTACCTGGCCGCAACCATACACAGTGTCTACAACGGTGGACAAAG  
GTGCTGGCCCCGGCTCGTGAAGGGCCACTGGCCGCGGAAGAAGACGACTTACTAAAAGAGCTTGTGGCCGAGGGCCG  
CAAGAACTGGGGCCAAAGTGGCCACTCGTATCCCTGGGCGTACGTCCAAACAGTGTGCGGAACGCTGGTACAACCCACTCG  
ATCCGAGTATCATCTCGTGGCAATACTCGCCGGAAGAGGACCGCATGATCCTGGACGCACAGGCCAGACTGGGCAACCGC  
TGGTCCGCCATCGCCGCCATGCTGCCTGGCCGTACAGAAGACGCTGTGAAGATCCGATGGAAATCGCTCTGCCGAGTGGC  
CAAAGGACAAGGCCGTCGTGGTCAACCCGACAAGGGTAAGATGACTCCCAAGGGCGTTATGATGCCTGGCCAGATGATGC  
AACAGGTCCAGGCTTTGACGGTGGAAATGGTGAAGAGTGAAGGAGTGCCTGCGTTCTCCATGCACCCACAGCAGCAAGGC  
ACGCAAAATGGTGCCTTTCGGAATGGCCAAATGATGGGAGGTAATAATATTAGAGTGGAGGGCAACACCCTCGATGAT  
GGGAGTATGGGCGGAACGGGATGATGTACCATAGCGACATGAGTGGCGGTGGGTACGACCCCTACCATGGCCCACTACC  
GGAAGCTCCGATGCAGCAACACATTTGTGAACAATGTATACGAGCATCCTTTGCCGCTGCAGGACCAATGGCCGGCAAT  
AATCGCAGGACTATCCCGTTGACCGTTCGCTCGAACATGGCCAAATGTCCACTGGGATGTGAGCATTTCACAACATTC  
CCAAGCACAGGACGGATACAGACAAGAGTACCAAGGCCGCTTTCGGGATATCCCTCCAATATGAACAGCGGTATGTA  
CAGCGGGGCGTCCACGCCTAGCGGAGGGATGAACAACGGCAAAATGTATGGCGGCAGCTCGCAGATCAACAATACC  
GCTGGAGGAGCCATGTACAGCGACTCACAGGTATCTTCGATCATTCGACAGCAATGGCCCATTCGCCACACCCTCAGAT  
GGTGTGCTACGACTACGGCATGCCCTCCATCGACTAAAAACATGAATGGAGGAGCGTCATCAAGCCACCCGCTGCATCCAG  
GCAATAATTCCATGCGAAACCCGCTTCGGCCTTTGCGCATCGACAGCAGCACTCGCATCAATACGTGGATCGCCCTGTC  
CACCTCCACACCAGTGGCTCACCATGAACAGCAGCACCCGACCATGCAACGCGTATTTCATGCACACGAGCAGACCA  
ACCACACCCAGAGGAGGAACCGCCAGTACATCACCACATCATTTGAAGCCGAGATCAAGTGACATCCAGCCTAAAGAGG  
AGCCGCGGCCCGGCAATGGCGCAGCCAATGTCCAACCCGGCTGCAATGTTCCGCCGATAGCCAGGCGGCAAGGCTTCA  
CCTTCGGCGGCCAACAGTAATCCAGTTCGCGGCCCTTCATGCACATGCAACATCATCAGAAGCGTAAAGAACAGCCGAGCGC  
GTCTAGCAAGATGGCCAAAGCTGGCCACCGAAACCTTTCAACCCGGCCGCGGCTTCGCCAGCGGTTCCAAGCTGGCC  
AGAGACCACCAATGCCAGTAGCAACTCAGGCTTACCCGATCTAACGATGATACGGCCGACGAGGATGACGACGGAGAG  
AACGCGCGGACTACTGAACCTTCTCTCAAGAAGGTCAAGCCGAGACTTAGCATCGATGCGCGCGGGCGTGGCCGACG  
GAGAAATGCGCAGCTCCGGTAGCGGCGACAATCTGGCCGGCCGTTGGAAGTCTGGATGTGTTTTTGAACGAGATCGGCGACG  
TTGGCCGGTTGTGGACCTCAAGATGGACGGCTTCCAGACGCTAGAAGAGCTGTGGCGAGTCTCAGGCGACATGGATCGA  
CTATCGTTA
