# Supplementary material for: Myb Transcription Factors and Light Regulate Sporulation in the Oomycete Phytophthora infestans
Source: PubMed Central journal article supplement (PMC3976263; doi:10.1371/journal.pone.0092086), 2014-04-04
Supplement: pone.0092086.s004.pdf [file pone.0092086.s004.pdf]

**Table S2.** Primers used for PCR.

| Target              | Gene in Broad Institute database      | Sequences (5' to 3')                                                     |
|---------------------|---------------------------------------|--------------------------------------------------------------------------|
| Actin-like promoter | PITG_09284                            | GCCGTGTACGATAGAAA, TATGTCTGATGCTAC                                       |
| Transporter RNA     | PITG_12808                            | AAGCTCATGTGCGTGACTGT,<br>CCTCCGAGCAGTACGGAAAC                            |
| Avr3A RNA           | PITG_14374                            | GGGACGCCAGCTCACTACATA,<br>TCCGCCAGCTTATCATTACCCA                         |
| bZIP RNA            | PITG_09190                            | CTCATTGAGTTTCCTTTTTGAC,<br>TAAGAGCTAGTGGAGTCGATG                         |
| CRN2 RNA            | PITG_17199,<br>18497, 18503,<br>05049 | CCGTGCTTTGAAAACCTGT,<br>CATCTCCAAGTCGGGACCTA                             |
| EF1 $\alpha$ RNA    | PITG_09349                            | CGGCGGTATTGGCACGGTA,<br>GAGTCCGAAGCGACGAAACCAC                           |
| Myb2R1 RNA          | PITG_01056                            | AAGCGCTGGTCGGTCATA,<br>GTGGTTCTTGATGGCATTATCC                            |
| MYB2R1 promoter     | PITG_01056                            | GCTCTAATCGATCAATCCACATATCAACGGCTCT,<br>AGGCCATTAAGGGCGCTTGTGTGGGACGTTTAC |
| Myb2R2 RNA          | PITG_08807                            | CAAATGATCATGGCGACAACA,<br>CCTTTGGCGATGGTAGTGCA                           |
| Myb2R3 RNA and DNA  | PITG_06748                            | TCAACGCTCGAGCAACGGCTG,<br>GCCATCGGTTGCTGAC                               |
| Myb2R4 RNA          | PITG_08755                            | GCGAAATGCTGAGAGTGACGAG,<br>CCCAGGCAGCAGTCGAGATA                          |
| Myb2R5 RNA          | PITG_00988                            | GCGCAACTCGGTAGTCCA,<br>GTAAGCGGCGACTGTAT                                 |
| Myb3R1 RNA and DNA  | PITG_16114                            | CGCGTGGCTTGAGGTCATACA,<br>CCTCCGCCTCGTGAATACTAGA                         |
| Myb3R2 RNA          | PITG_13133                            | GTTGACCGTCGCTCGAACAT,<br>GCTGCGAATGATGCGAAGATA                           |
| Myb3R3 RNA          | PITG_00038                            | AGGTGCCTGGACGGAATCACA,<br>ATGGACCAGCGATTGCCTAGTT                         |
| Myb3R4 RNA          | PITG_19851                            | TCGCTATGTTGATCGCCTAC,<br>GCCAACGACAGCATTAAACGAA                          |
| Myb3R6 RNA          | PITG_05990                            | CGTGCGCAGTCAGACCCAATGT,<br>CCGTTCCCGAGCGAATTGTT                          |
| NPP1 RNA            | PITG_16866                            | TACCATCCGCCCGAATCCAAC,<br>ATTCTCCAGCGCCGTTTCGT                           |
| Pks1 RNA            | PITG_10884                            | CGCAGTCCGCTTCTACGC,<br>CCGAACTGCCACAAGTCAACT                             |
| Pks1 promoter       | PITG_10884                            | CTTGCTGCAGCGGAAATC,<br>CGCGTCTTCTTTGACC                                  |
| RiboS3a RNA         | PITG_11766                            | GATTTACGGCATGGACTTC,<br>TCTTGCGTAGGTGGTCTTC                              |
| Ste20 intron DNA    | PITG_06107                            | GCTCTAATCGATCAATCCACATATCAACGGCTCT,<br>AGGCCATTAAGGGCGCTTGTGTGGGACGTTTAC |
