# Supplementary material for: Myb Transcription Factors and Light Regulate Sporulation in the Oomycete Phytophthora infestans
Source: PubMed Central journal article supplement (PMC3976263; doi:10.1371/journal.pone.0092086), 2014-04-04
Supplement: pone.0092086.s005.pdf [file pone.0092086.s005.pdf]

**Table S3.** Numerical values of RT-qPCR data shown in Figs. 3 and 4.

## Fig. 3A

| Hour:  | 48        | 60        | 72        | 84        | 96        | 108       | 120       |
|--------|-----------|-----------|-----------|-----------|-----------|-----------|-----------|
| Myb2R1 | 0.02±0.02 | 0.34±0.05 | 1.56±0.17 | 0.83±0.21 | 1.46±0.12 | 1.12±0.12 | 1.69±0.23 |
| Myb2R3 | 0.01±0.00 | 0.30±0.04 | 1.50±0.09 | 0.66±0.03 | 1.71±0.13 | 1.01±0.06 | 1.83±0.09 |
| Myb2R4 | 0.03±0.00 | 0.50±0.04 | 1.80±0.11 | 1.55±0.03 | 1.50±0.22 | 0.91±0.08 | 0.78±0.09 |
| Pks1   | 0.02±0.01 | 0.02±0.00 | 0.70±0.10 | 0.26±0.02 | 1.98±0.80 | 1.52±0.16 | 2.40±0.12 |
| Avr3a  | 2.53±0.17 | 2.80±0.10 | 1.06±0.15 | 0.55±0.27 | 0.02±0.02 | 0.02±0.02 | 0.02±0.02 |
| NPP1   | 0.03±0.03 | 0.29±0.17 | 0.94±0.36 | 1.33±0.26 | 1.36±0.23 | 1.71±0.11 | 1.35±0.36 |
| CRN2   | 0.71±0.19 | 1.00±0.03 | 1.00±0.21 | 0.97±0.13 | 1.09±0.19 | 1.28±0.25 | 0.95±0.62 |
| EF1a   | 0.90±0.20 | 0.97±0.21 | 0.78±0.27 | 0.84±0.18 | 0.90±0.20 | 1.04±0.23 | 1.57±0.34 |

## Fig. 3B

| Hour:  | 80        | 84        | 88        | 92        | 96        | 100       | 104       | 108       |
|--------|-----------|-----------|-----------|-----------|-----------|-----------|-----------|-----------|
| Myb2R1 | 0.30±0.16 | 0.51±0.10 | 0.56±0.03 | 1.35±0.11 | 1.10±0.03 | 1.18±0.03 | 1.30±0.22 | 1.21±0.03 |
| Myb2R3 | 0.43±0.09 | 0.42±0.40 | 0.47±0.47 | 1.50±0.14 | 1.10±0.17 | 1.31±0.28 | 1.10±0.35 | 0.90±0.39 |
| Myb2R4 | 0.50±0.22 | 1.00±0.06 | 1.11±0.02 | 1.32±0.03 | 1.00±0.13 | 0.93±0.04 | 0.82±0.01 | 0.77±0.02 |
| Pks1   | 0.12±0.02 | 0.20±0.02 | 0.24±0.16 | 0.76±0.58 | 1.03±0.38 | 1.53±0.30 | 1.27±0.54 | 2.11±0.66 |
| Avr3a  | 3.02±0.15 | 2.08±0.12 | 2.13±0.12 | 0.67±0.07 | 0.25±0.03 | 0.20±0.07 | 0.15±0.06 | 0.15±0.02 |
| NPP1   | 0.56±0.18 | 1.31±0.44 | 0.60±0.00 | 0.92±0.34 | 0.64±0.51 | 1.50±0.17 | 1.21±0.11 | 1.39±0.10 |

## Fig. 4A

| Hour:  | 60        | 72        | 84        | 96        | 108       | 120       |
|--------|-----------|-----------|-----------|-----------|-----------|-----------|
| Myb2R1 | 0.24±0.06 | 1.08±0.18 | 0.85±0.03 | 1.25±0.04 | 1.12±0.14 | 1.45±0.09 |
| Myb2R3 | 0.22±0.04 | 0.87±0.18 | 0.59±0.00 | 1.36±0.01 | 1.17±0.14 | 1.80±0.08 |
| Myb2R4 | 0.52±0.19 | 1.16±0.12 | 1.23±0.15 | 0.99±0.11 | 1.10±0.23 | 1.00±0.15 |
| PKS    | 0.04±0.02 | 0.28±0.11 | 0.26±0.01 | 1.33±0.10 | 1.86±0.13 | 2.23±0.06 |

## Fig. 4B

| Hour:  | 60        | 72        | 84        | 96        | 108       | 120       |
|--------|-----------|-----------|-----------|-----------|-----------|-----------|
| Myb2R1 | 0.06±0.02 | 0.49±0.11 | 0.80±0.03 | 1.04±0.00 | 1.70±0.10 | 2.00±0.10 |
| Myb2R3 | 0.06±0.03 | 0.35±0.11 | 0.81±0.06 | 1.04±0.01 | 1.62±0.09 | 2.00±0.07 |
| Myb2R4 | 0.13±0.02 | 0.72±0.09 | 0.98±0.08 | 0.90±0.03 | 1.63±0.15 | 1.40±0.24 |
| PKS1   | 0.05±0.02 | 0.09±0.03 | 0.18±0.03 | 0.55±0.16 | 1.59±0.16 | 2.00±0.32 |

## Fig. 4C

| Hour:  | 60        | 72        | 84        | 96        | 108       | 120       |
|--------|-----------|-----------|-----------|-----------|-----------|-----------|
| Myb2R1 | 0.10±0.05 | 0.70±0.11 | 0.85±0.15 | 1.05±0.18 | 1.50±0.23 | 1.80±0.33 |
| Myb2R3 | 0.12±0.07 | 0.56±0.13 | 0.93±0.20 | 1.06±0.16 | 1.43±0.27 | 1.86±0.30 |
| Myb2R4 | 0.15±0.07 | 0.89±0.14 | 1.13±0.20 | 0.95±0.14 | 1.34±0.23 | 1.40±0.26 |
| PKS1   | 0.06±0.03 | 0.09±0.04 | 0.12±0.03 | 0.23±0.05 | 1.28±0.21 | 2.00±0.31 |
